# Supplementary material for: Precursor-Directed Biosynthesis of Aminofulvenes: New Chalanilines from Endophytic Fungus Chalara sp
Source: MDPI journal article supplement (doi:10.3390/molecules26154418), 2021-07-22
Supplement: s1 [file s1]

## Supplemental Information

### **Precursor-directed Biosynthesis of Aminofulvenes: new Chalanilines from endophytic fungus *Chalara* sp.**

Mahsa Khoshbakht <sup>1</sup>, Jason Srey <sup>1</sup>, Donovan A. Adpressa <sup>1</sup>, Annika Jagels <sup>2</sup>, Sandra Loesgen

<sup>1,2, \*</sup>

<sup>1</sup> Department of Chemistry, Oregon State University, Corvallis, Oregon 97331, United States

<sup>2</sup> Present Address: Whitney Laboratory for Marine Bioscience, Department of Chemistry, University of Florida, St. Augustine, Florida 32080, United States.

\* Address for correspondence

-Table of content-

|                   |                                                   |  |
|-------------------|---------------------------------------------------|--|
| <b>Figure S1</b>  | <sup>1</sup> H NMR spectrum of <b>1</b>           |  |
| <b>Figure S2</b>  | Expanded <sup>1</sup> H NMR spectrum of <b>1</b>  |  |
| <b>Figure S3</b>  | <sup>13</sup> C NMR spectrum of <b>1</b>          |  |
| <b>Figure S4</b>  | Expanded <sup>13</sup> C NMR spectrum of <b>1</b> |  |
| <b>Figure S5</b>  | COSY NMR spectrum of <b>1</b>                     |  |
| <b>Figure S6</b>  | HSQC NMR spectrum of <b>1</b>                     |  |
| <b>Figure S7</b>  | HMBC NMR spectrum of <b>1</b>                     |  |
| <b>Figure S8</b>  | <sup>1</sup> H NMR spectrum of <b>2</b>           |  |
| <b>Figure S9</b>  | Expanded <sup>1</sup> H NMR spectrum of <b>2</b>  |  |
| <b>Figure S10</b> | <sup>13</sup> C NMR spectrum of <b>2</b>          |  |
| <b>Figure S11</b> | Expanded <sup>13</sup> C NMR spectrum of <b>2</b> |  |
| <b>Figure S12</b> | COSY NMR spectrum of <b>2</b>                     |  |
| <b>Figure S13</b> | HSQC NMR spectrum of <b>2</b>                     |  |
| <b>Figure S14</b> | HMBC NMR spectrum of <b>2</b>                     |  |
| <b>Figure S15</b> | <sup>1</sup> H NMR spectrum of <b>3</b>           |  |
| <b>Figure S16</b> | Expanded <sup>1</sup> H NMR spectrum of <b>3</b>  |  |
| <b>Figure S17</b> | <sup>13</sup> C NMR spectrum of <b>3</b>          |  |
| <b>Figure S18</b> | COSY NMR spectrum of <b>3</b>                     |  |
| <b>Figure S19</b> | HSQC NMR spectrum of <b>3</b>                     |  |
| <b>Figure S20</b> | HMBC NMR spectrum of <b>3</b>                     |  |
| <b>Figure S21</b> | <sup>1</sup> H NMR spectrum of <b>4</b>           |  |
| <b>Figure S22</b> | Expanded <sup>1</sup> H NMR spectrum of <b>4</b>  |  |
| <b>Figure S23</b> | <sup>13</sup> C NMR spectrum of <b>4</b>          |  |

|                   |                                                                           |  |
|-------------------|---------------------------------------------------------------------------|--|
| <b>Figure S24</b> | COSY NMR spectrum of <b>4</b>                                             |  |
| <b>Figure S25</b> | HSQC NMR spectrum of <b>4</b>                                             |  |
| <b>Figure S26</b> | HMBC NMR spectrum of <b>4</b>                                             |  |
| <b>Figure S27</b> | <sup>1</sup> H NMR spectrum of <b>5</b>                                   |  |
| <b>Figure S28</b> | Expanded <sup>1</sup> H NMR spectrum of <b>5</b>                          |  |
| <b>Figure S29</b> | <sup>13</sup> C NMR spectrum of <b>5</b>                                  |  |
| <b>Figure S30</b> | COSY NMR spectrum of <b>5</b>                                             |  |
| <b>Figure S31</b> | HSQC NMR spectrum of <b>5</b>                                             |  |
| <b>Figure S32</b> | HMBC NMR spectrum of <b>5</b>                                             |  |
| <b>Figure S33</b> | Biotransformation of vorinostat analogs into chalaniline A type molecules |  |
| <b>Figure S34</b> | Time course of chalaniline A production                                   |  |
| <b>Figure S35</b> | Presence of chalanilines in culture broth, not fungal cells               |  |
| <b>Figure S36</b> | Vorinostat derivatives made in this study                                 |  |

\*All the experiments and their NMR data were collected at room temperature.

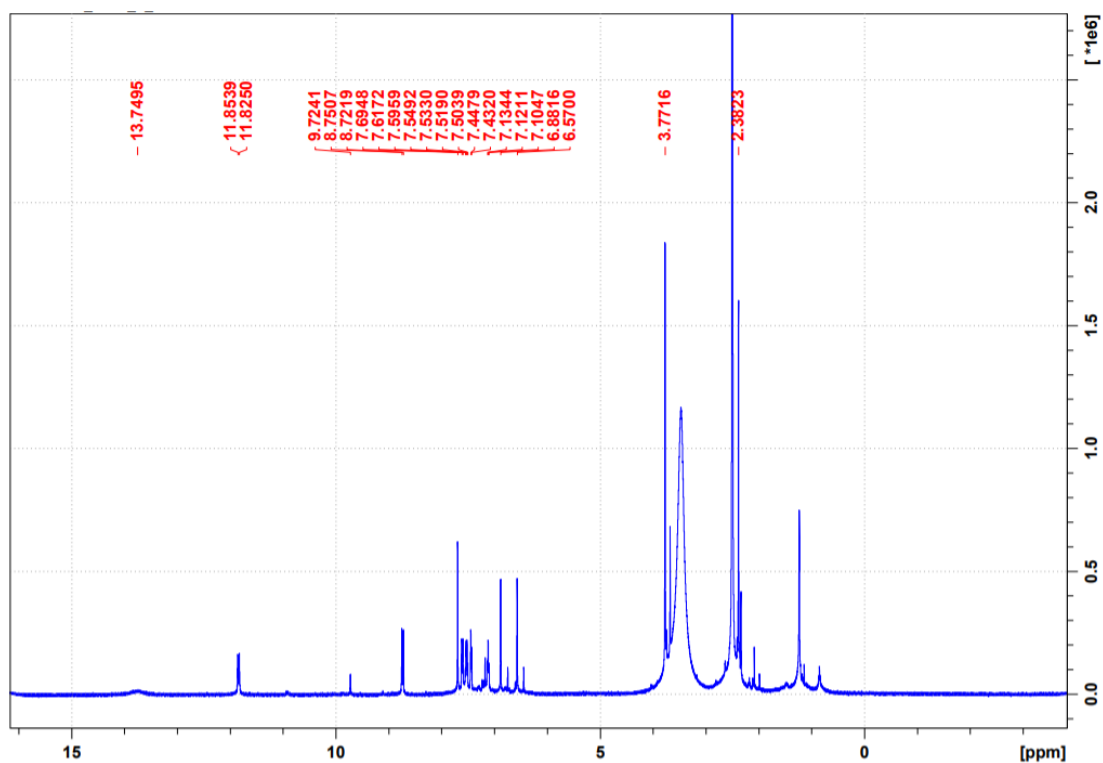

Figure S1.  $^1\text{H}$  NMR spectrum (500 MHz, DMSO) of **1**.

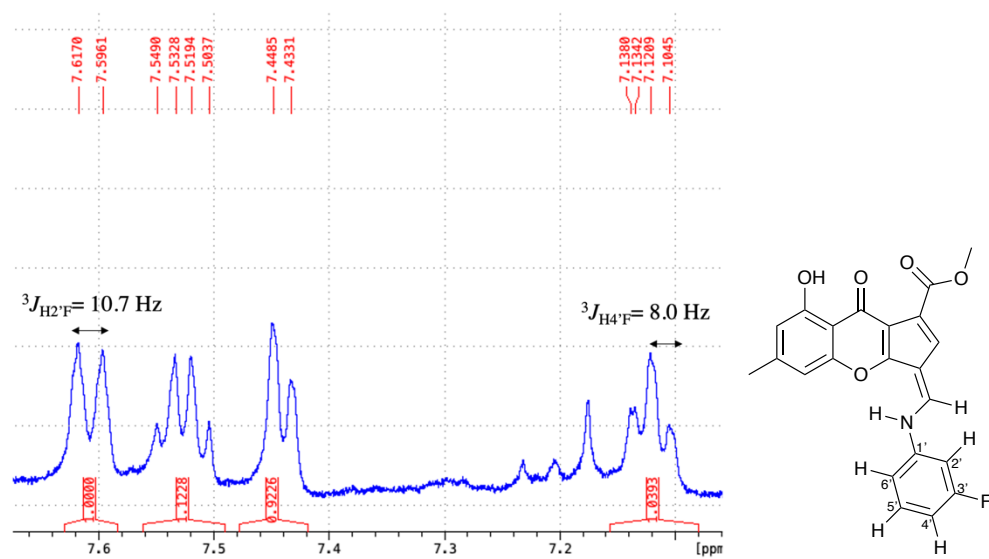

Figure S2. Expanded  $^1\text{H}$  NMR spectrum of the H-F couplings of **1**.

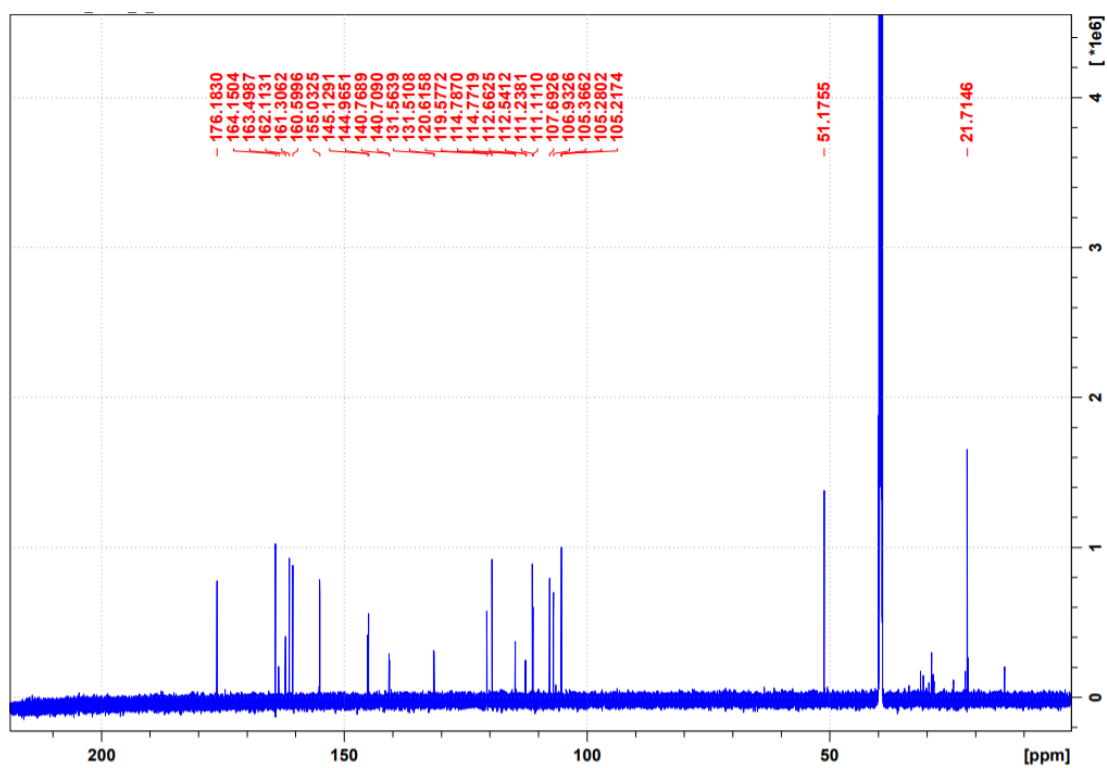

Figure S3.  $^{13}\text{C}$  NMR spectrum (176 MHz, DMSO) of **1**.

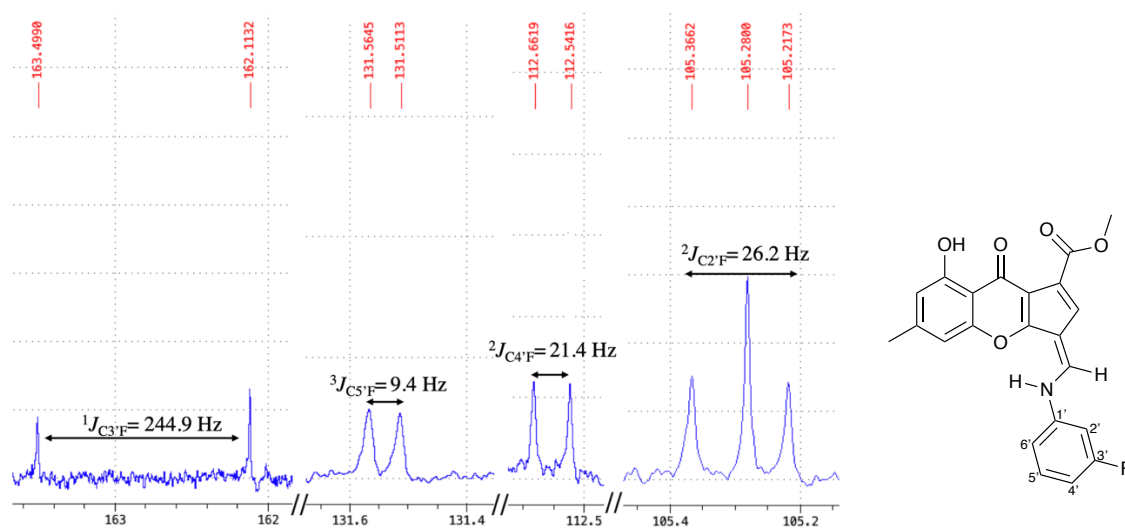

Figure S4. Expanded  $^{13}\text{C}$  NMR spectrum of the C-F couplings of **1**.

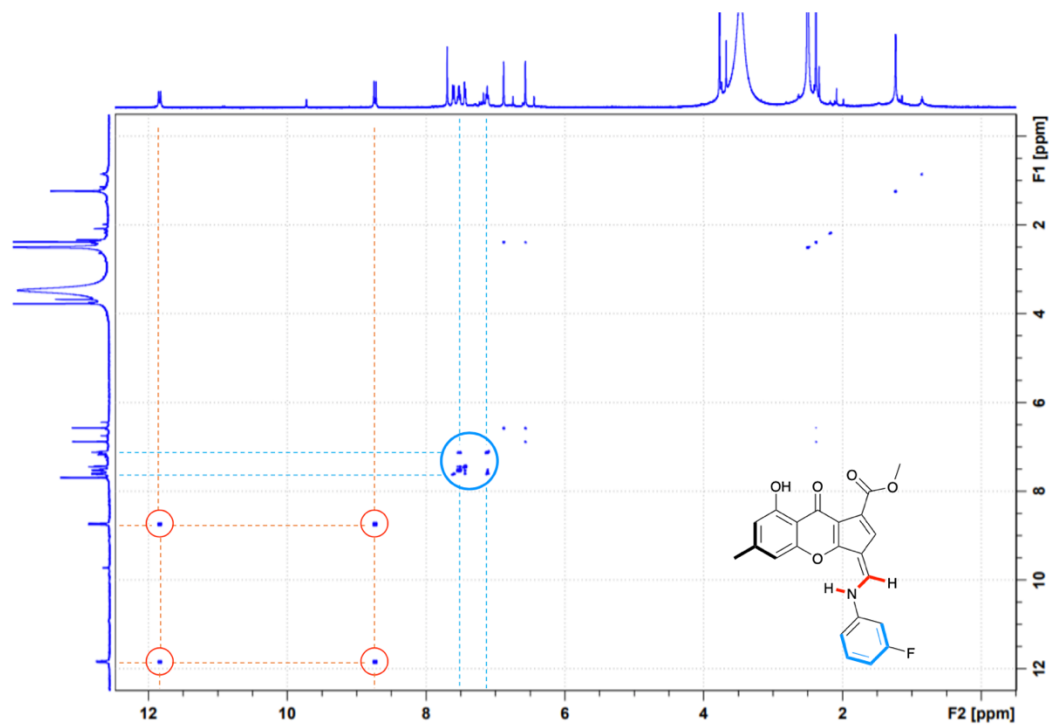

Figure S5. COSY NMR spectrum of **1**.

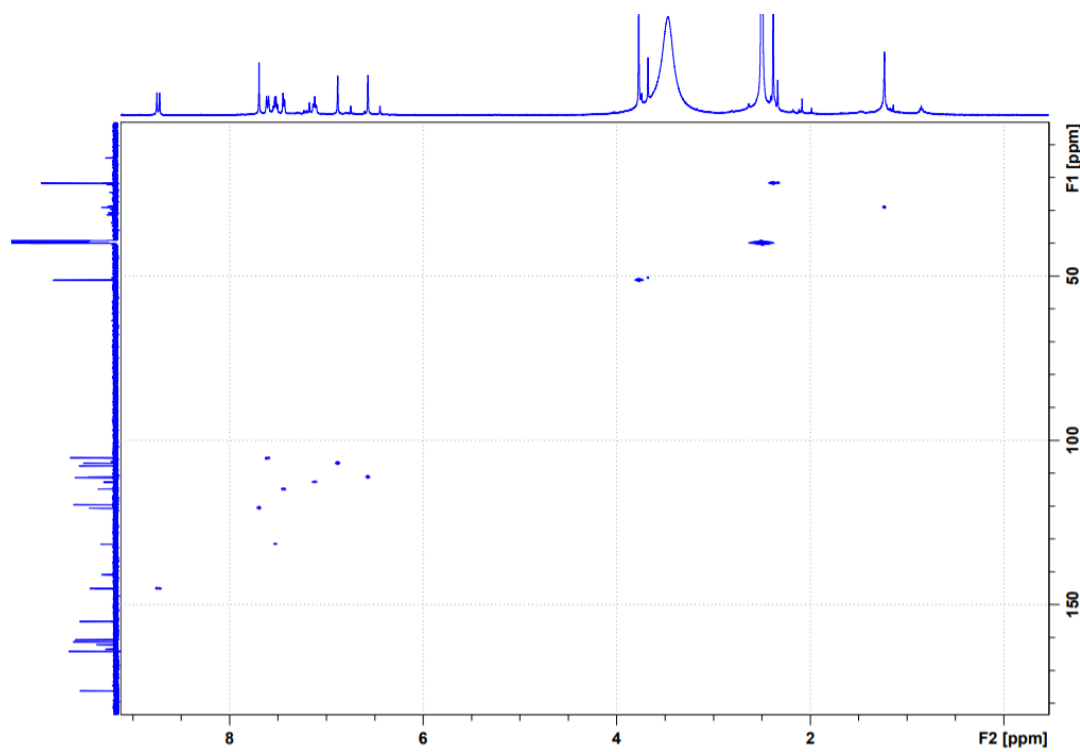

Figure S6. HSQC NMR spectrum of **1**.

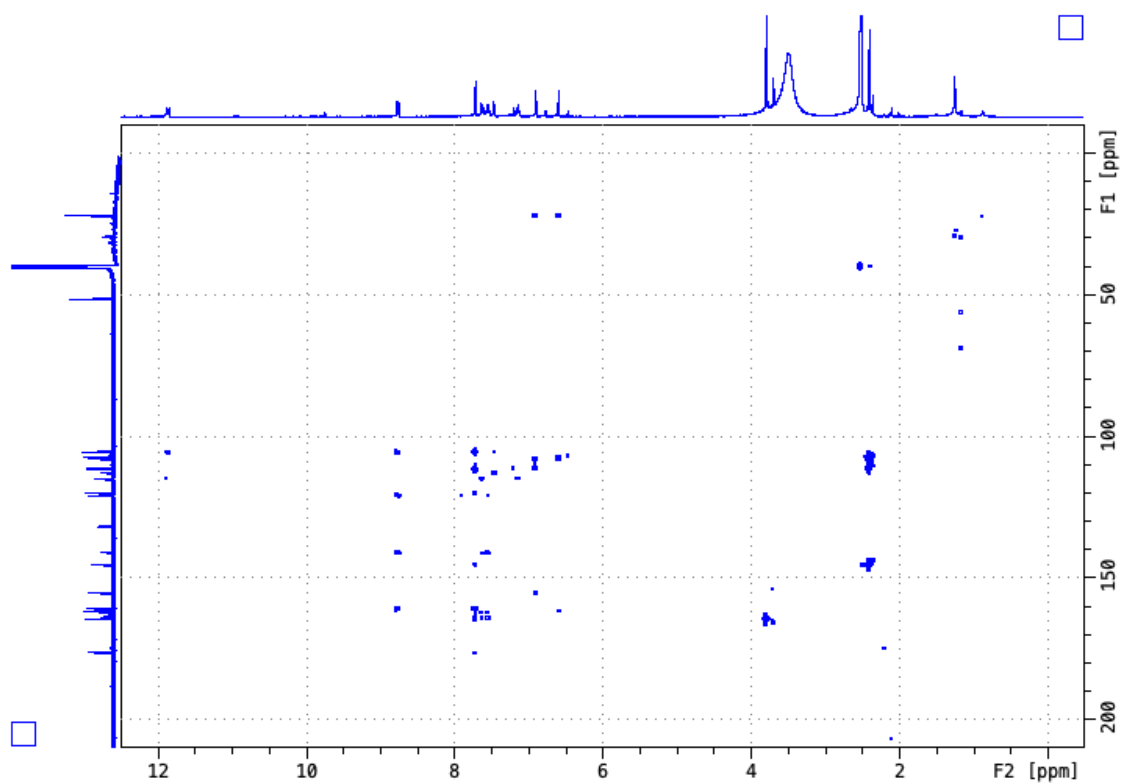

Figure S7.  $^1\text{H}$ - $^{13}\text{C}$  HMBC NMR spectrum of **1**.

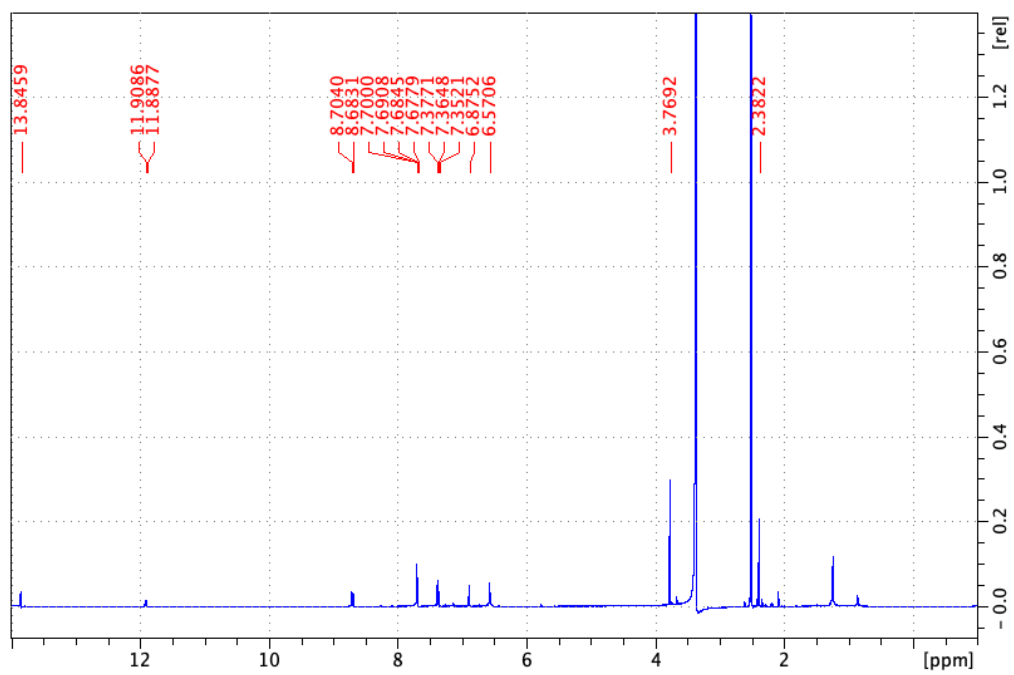

Figure S8.  $^1\text{H}$  NMR spectrum (700 MHz, DMSO) of **2**.

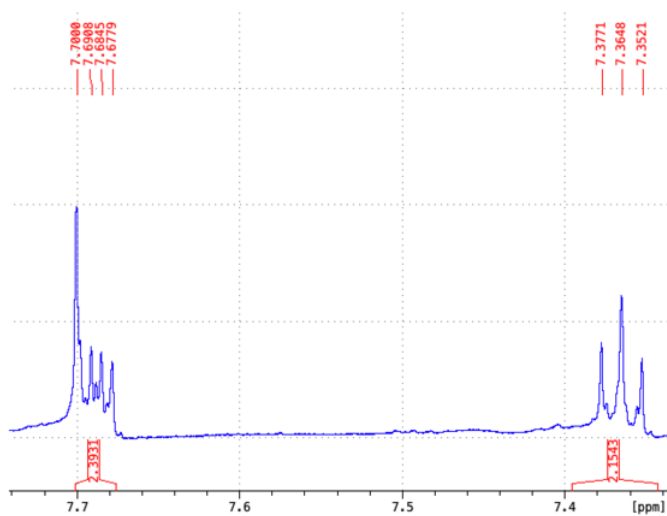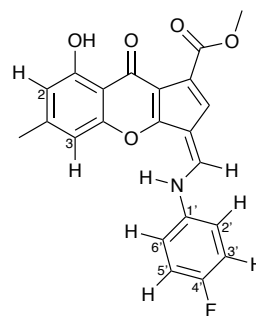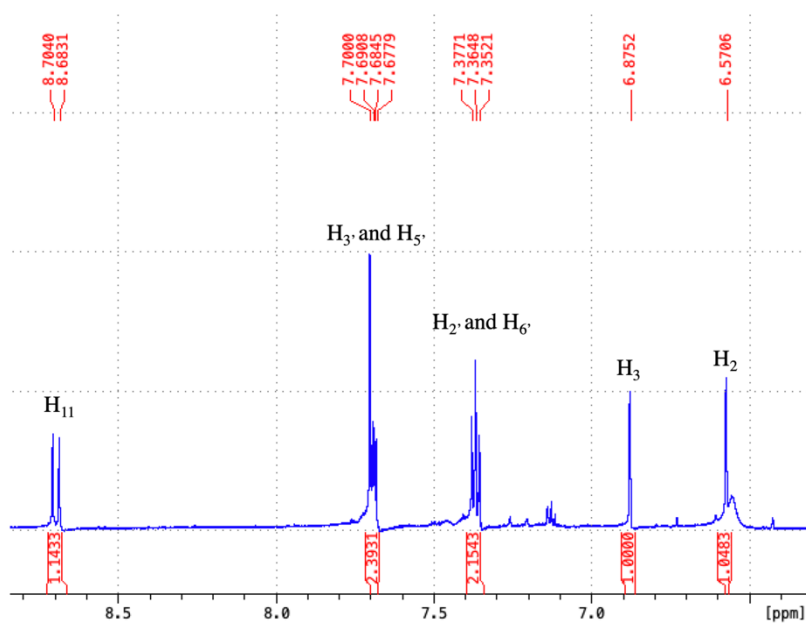

Figure S9. Expanded  $^1\text{H}$  NMR spectrum of the H-F couplings of **2**.



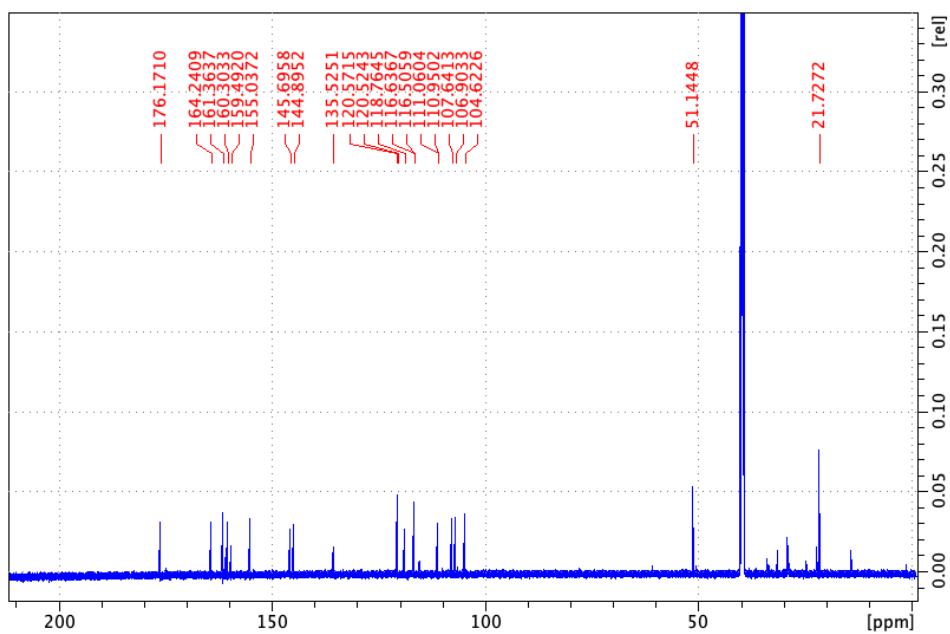

Figure S10.  $^{13}\text{C}$ NMR spectrum (176 MHz, DMSO) of **2**.

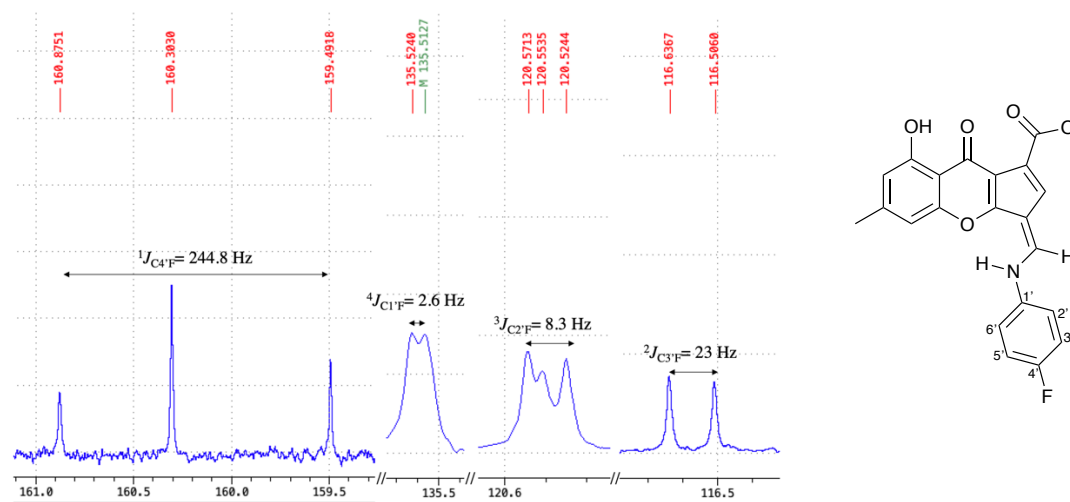

Figure S11. Expanded  $^{13}\text{C}$  NMR spectrum of the C-F couplings of **2**.

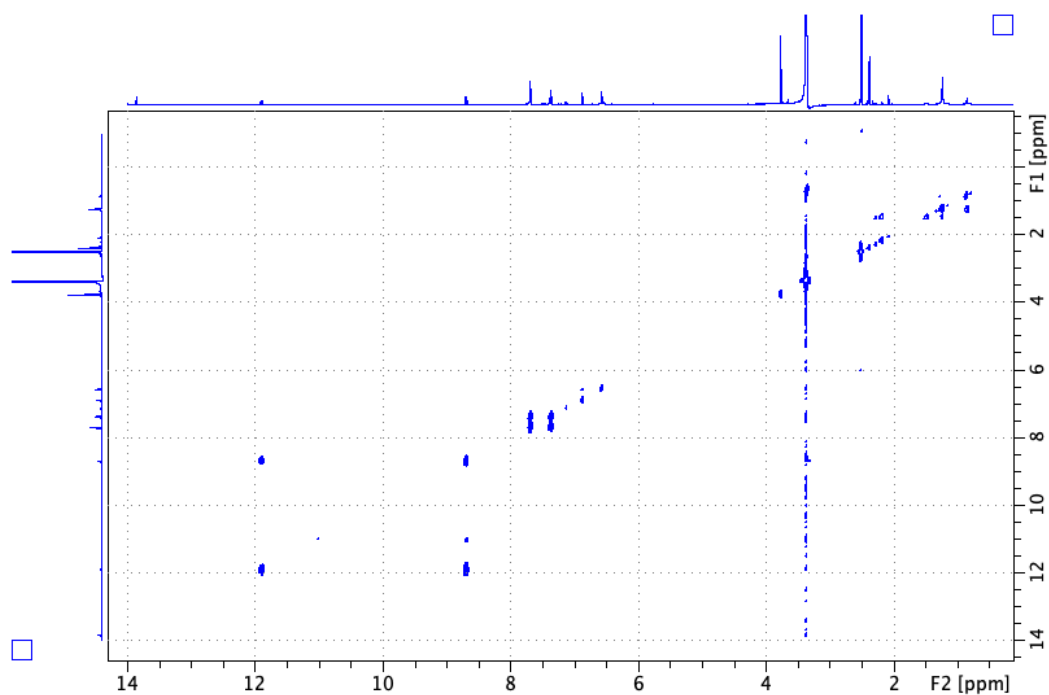

Figure S12. COSY NMR spectrum of **2**.

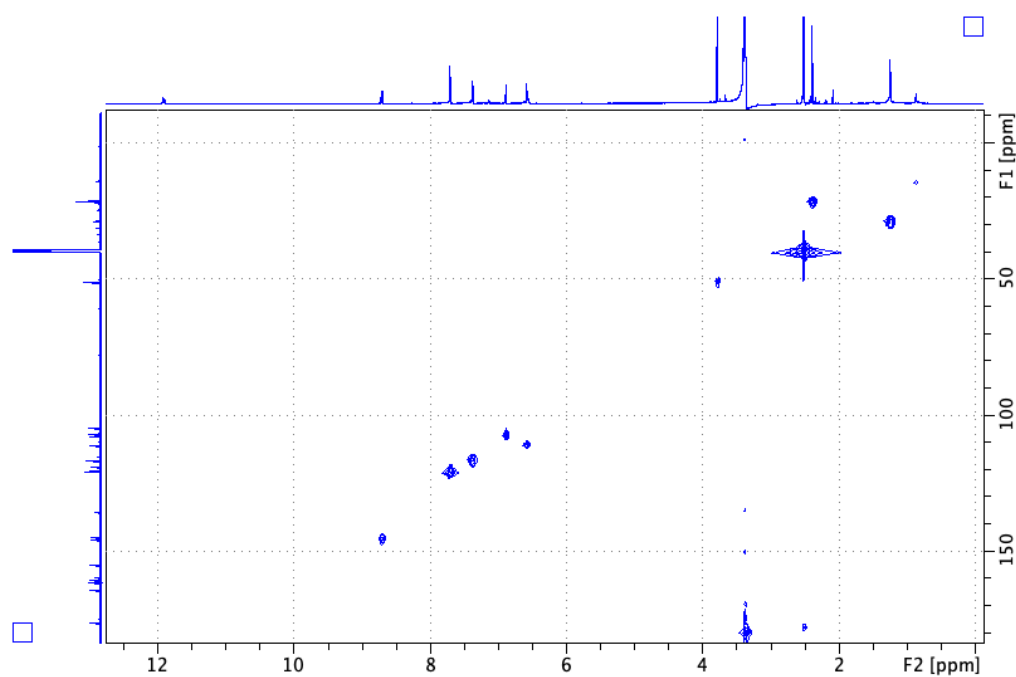

Figure S13. HSQC NMR spectrum of **2**.

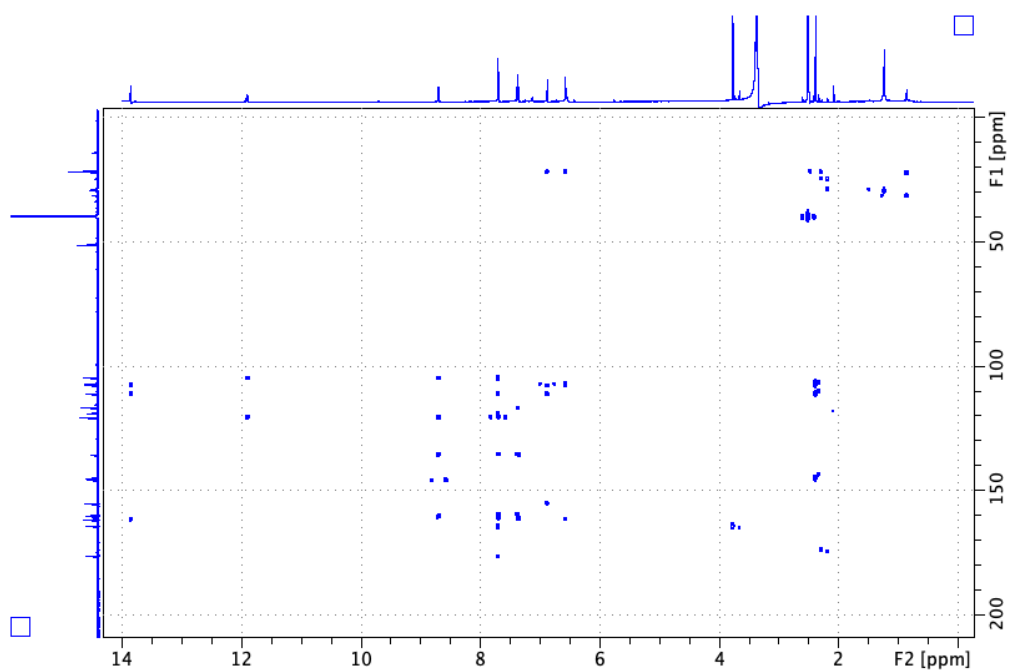

Figure S14.  $^1\text{H}$ - $^{13}\text{C}$  HMBC NMR spectrum of **2**.

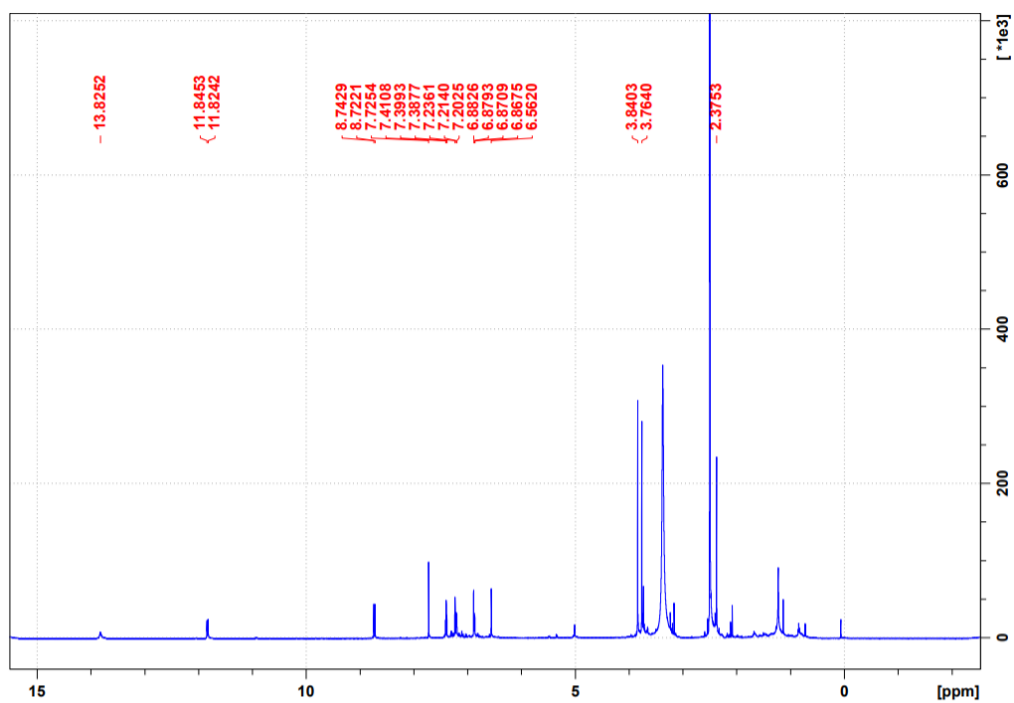

Figure S15.  $^1\text{H}$  NMR spectrum (700 MHz, DMSO) of **3**.

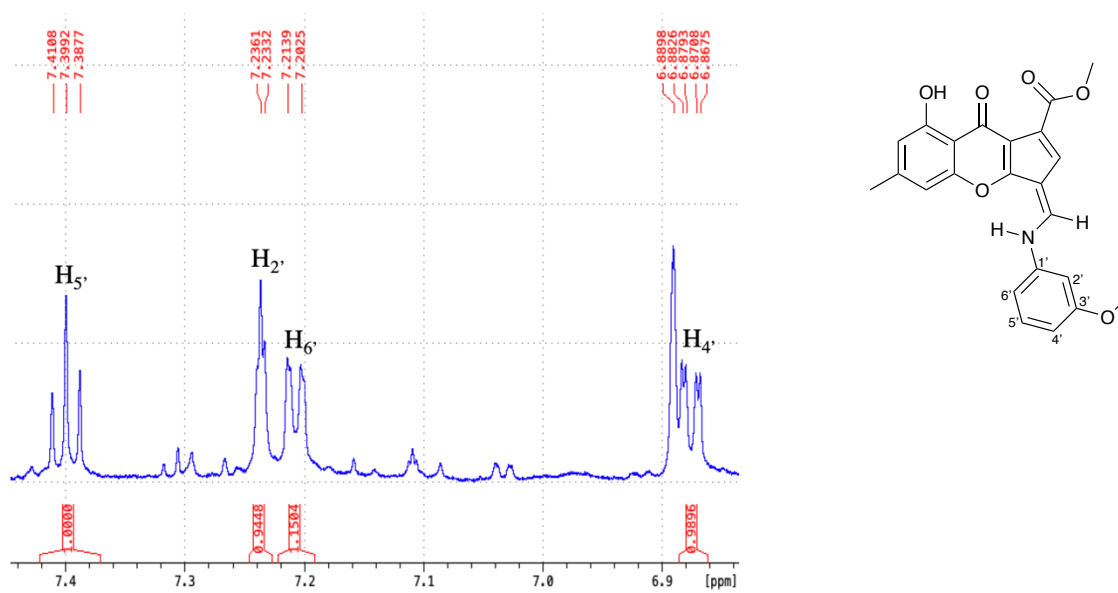

Figure S16. Expanded aromatic region of the  $^1\text{H}$  NMR spectrum of **3**.

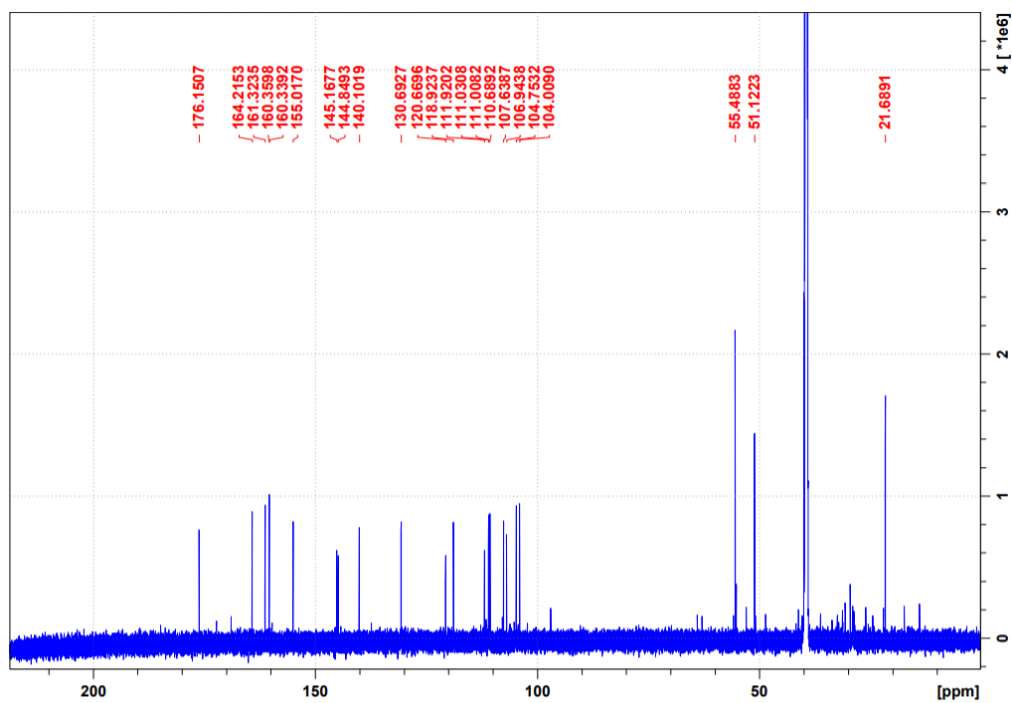

Figure S17.  $^{13}\text{C}$  NMR spectrum (176 MHz, DMSO) of **3**.

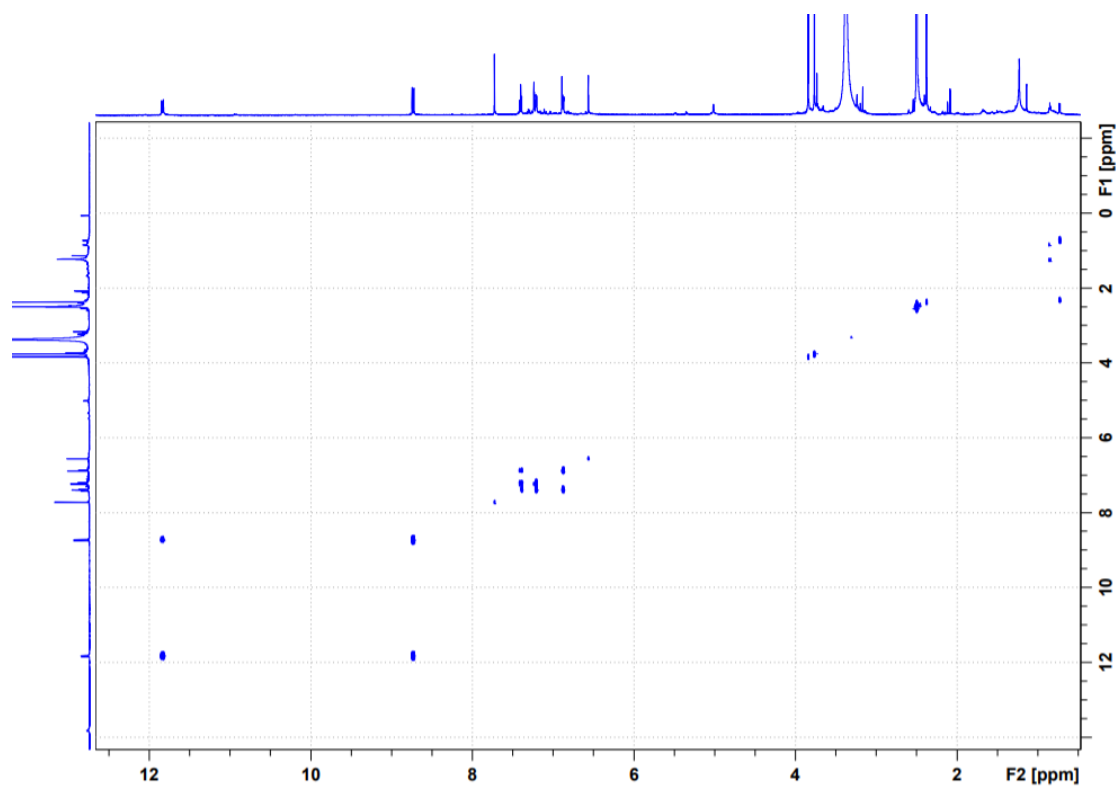

Figure S18. COSY NMR spectrum of **3**.

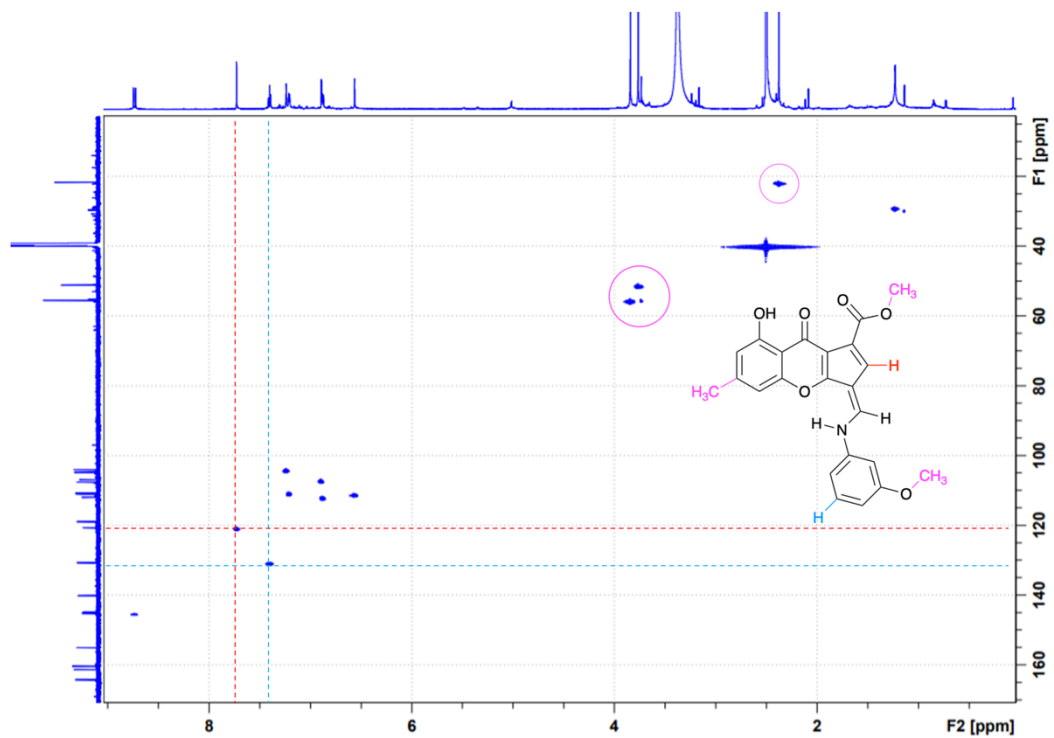

Figure S19. HSQC NMR spectrum of **3**.

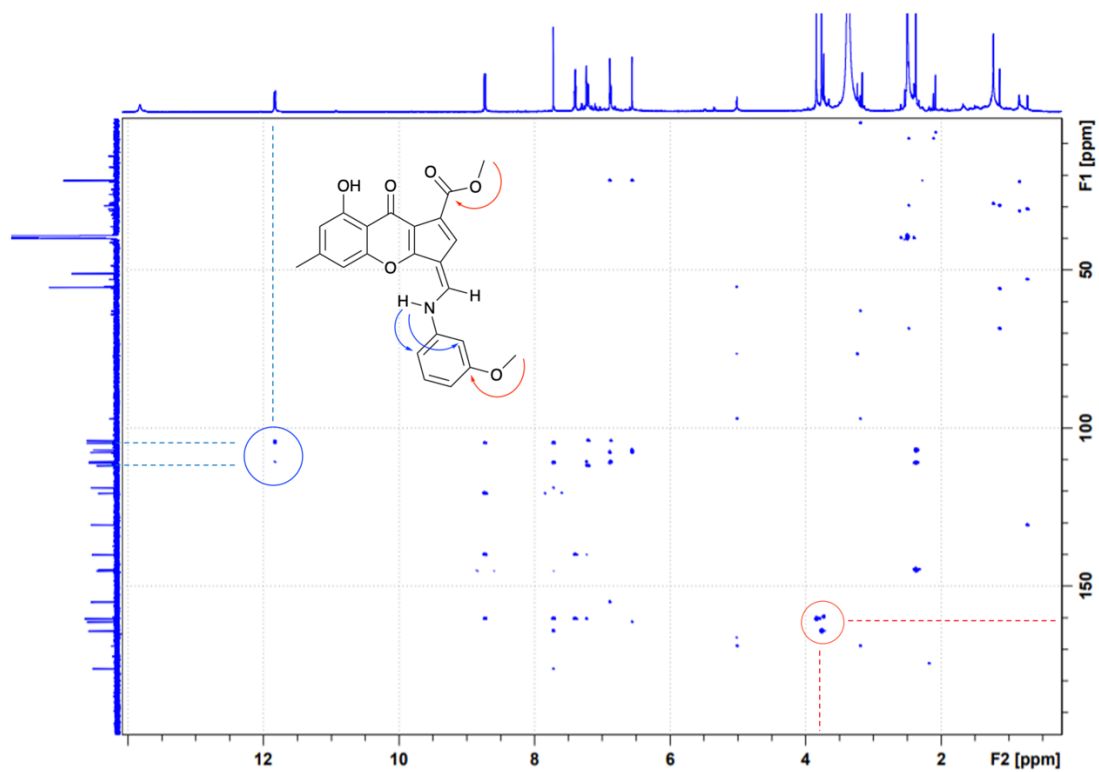

Figure S20.  $^1\text{H}$ - $^{13}\text{C}$  HMBC NMR spectrum of **3**.

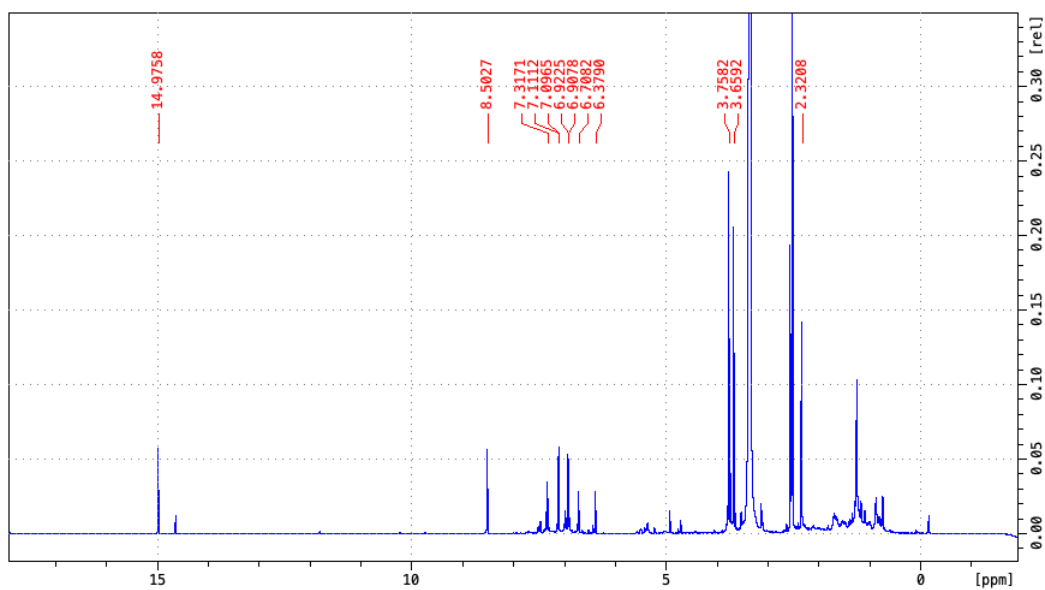

Figure S21.  $^1\text{H}$  NMR spectrum (600 MHz, DMSO) of **4**.

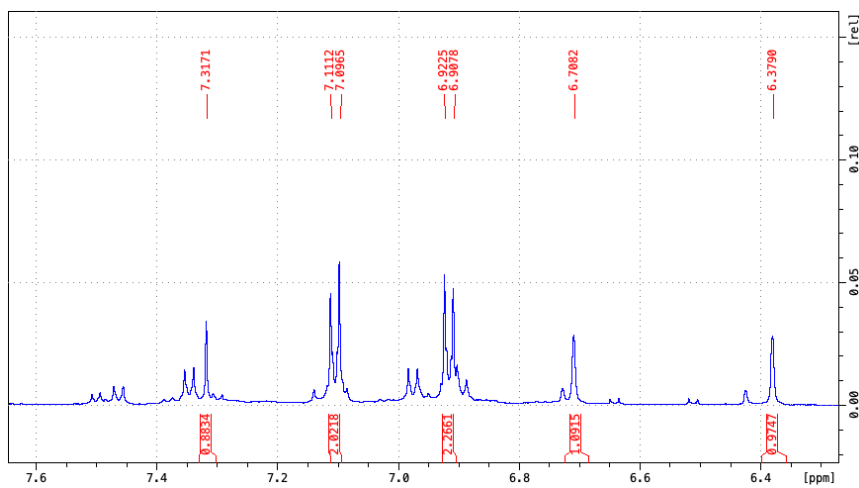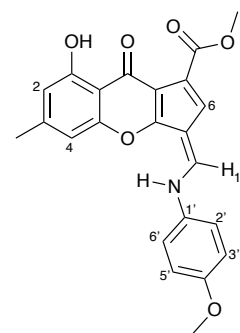

Figure S22. Expanded aromatic region of the  $^1\text{H}$  NMR spectrum of **4**.

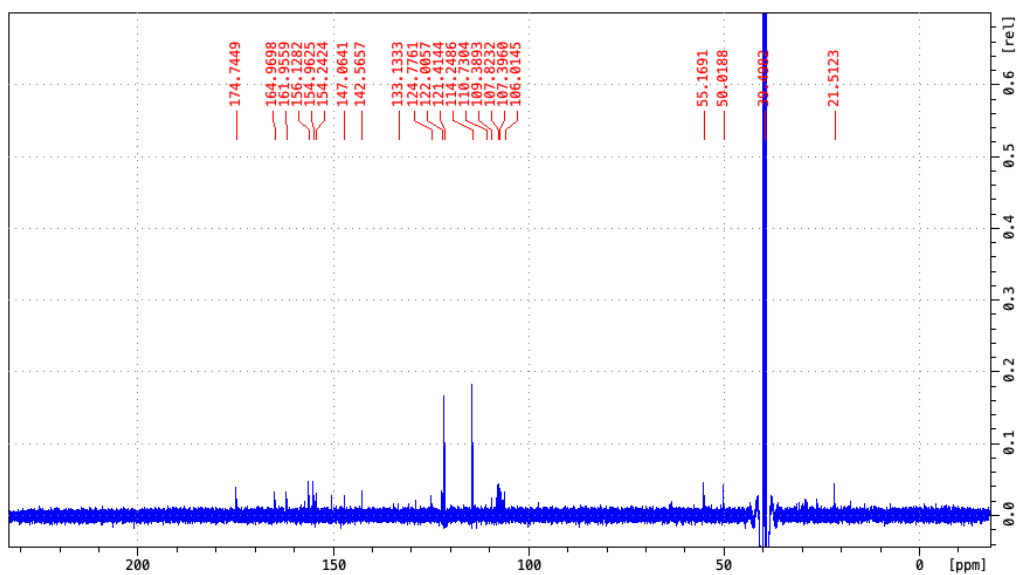

Figure S23.  $^{13}\text{C}$  NMR spectrum (150 MHz, DMSO) of **4**.

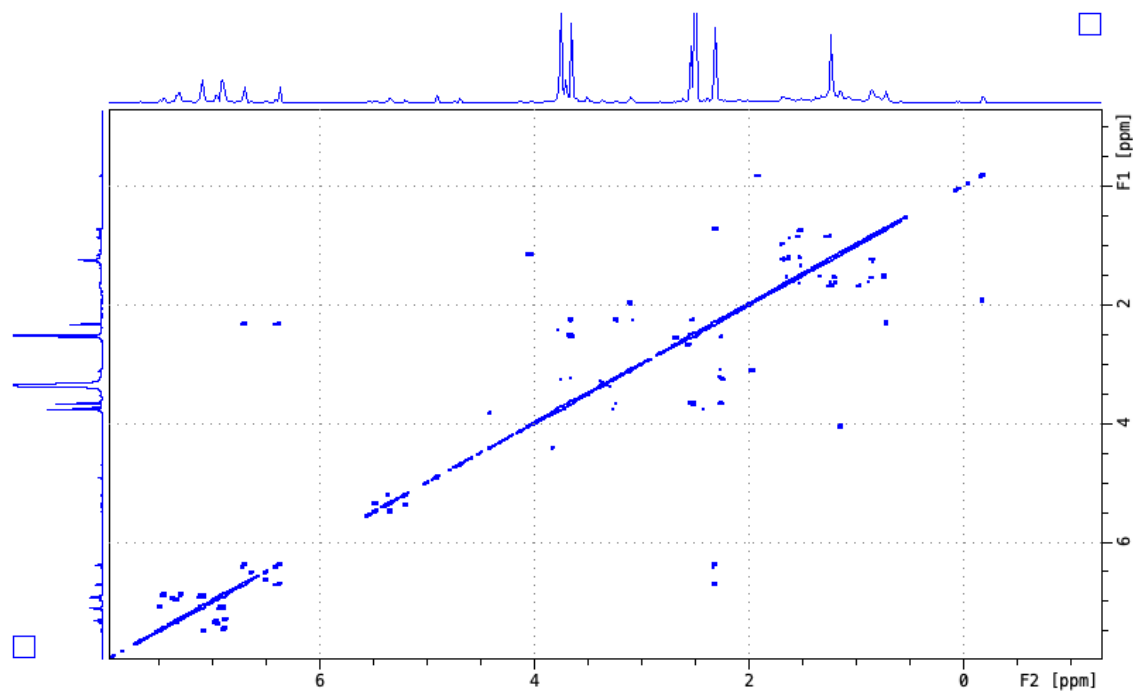

Figure S24. COSY NMR spectrum of **4**.



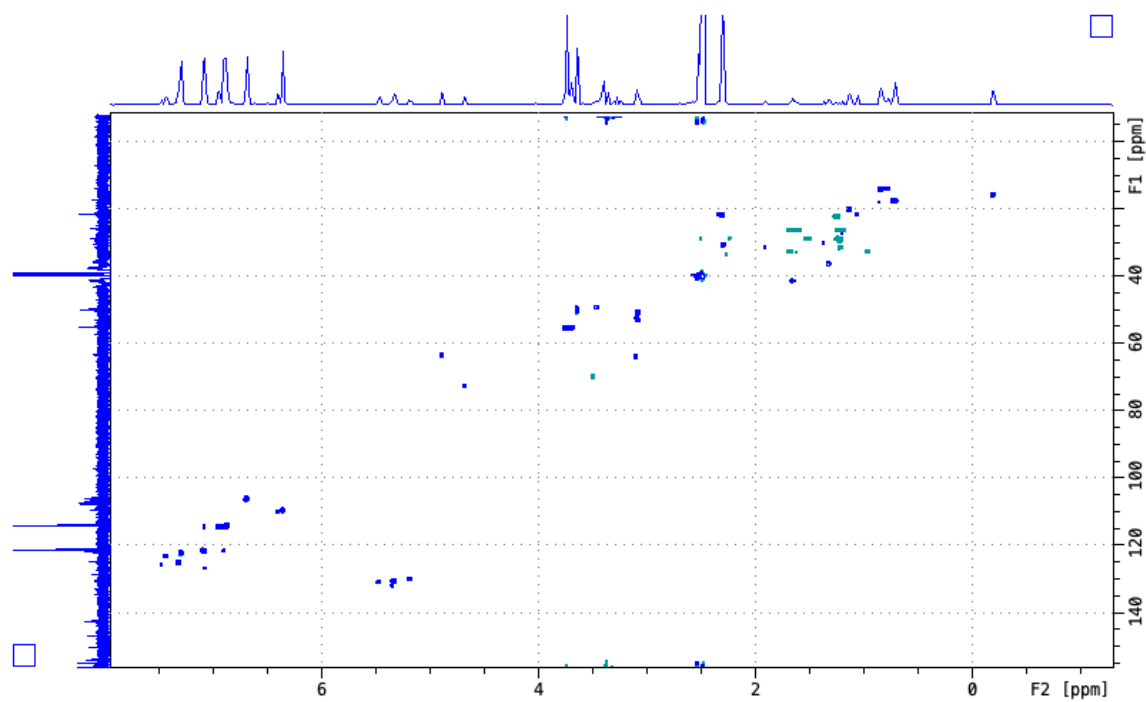

Figure S25. HSQC NMR spectrum of **4**.

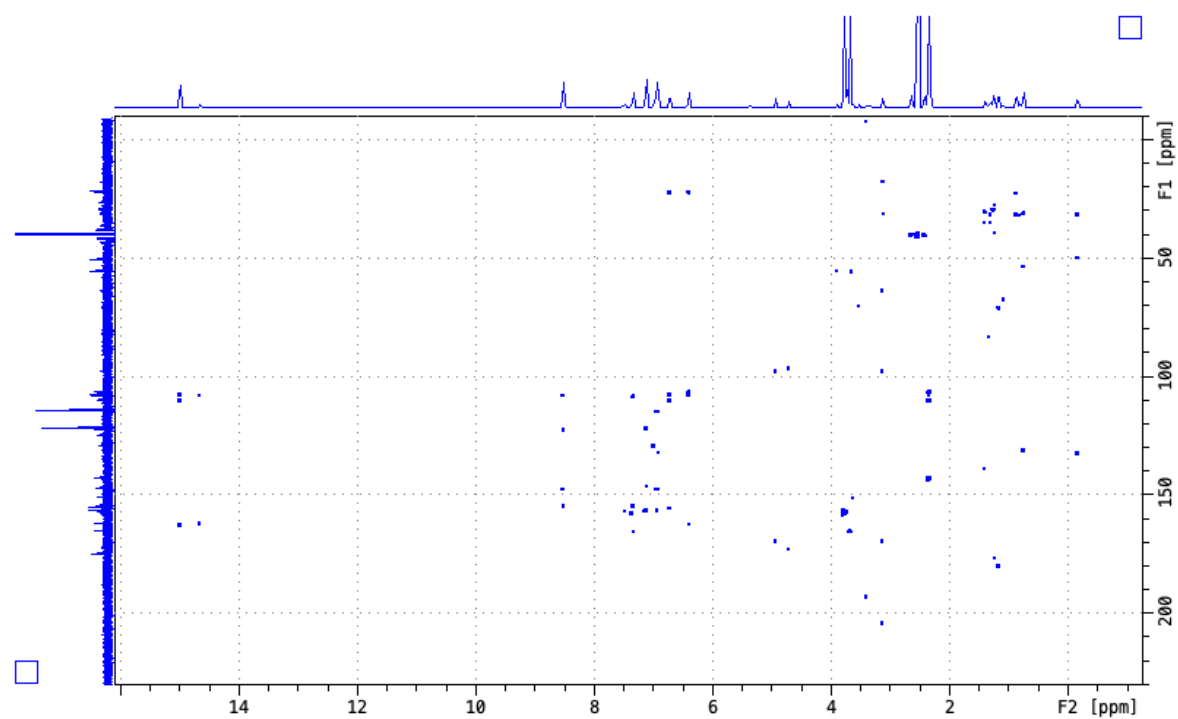

Figure S26.  $^1\text{H}$ - $^{13}\text{C}$  HMBC NMR spectrum of **4**.

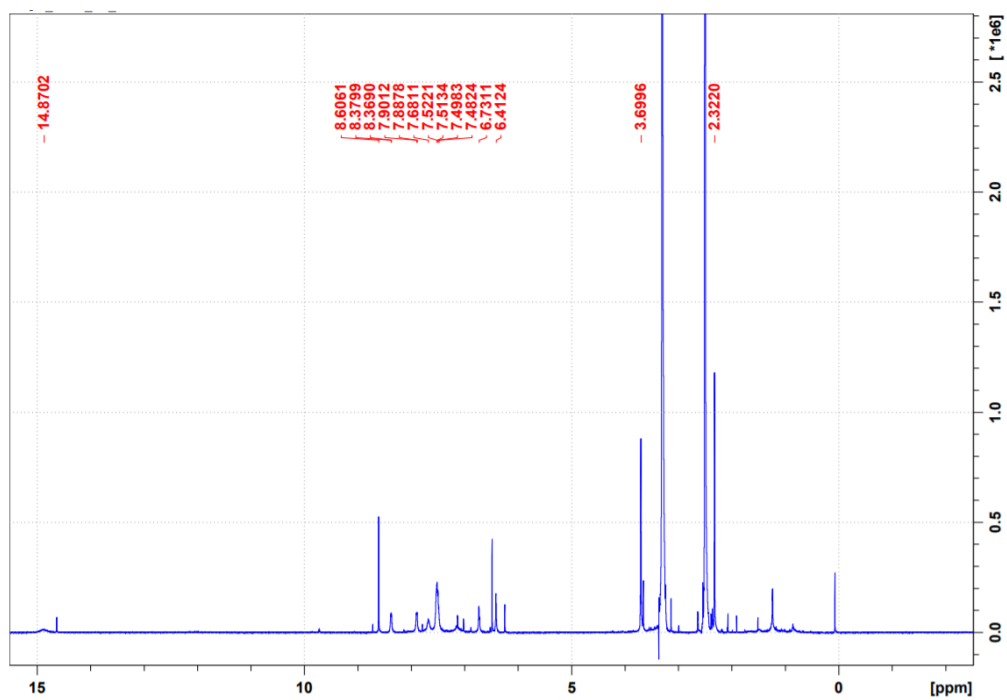

Figure S27.  $^1\text{H}$  NMR spectrum (500 MHz, DMSO) of **5**.

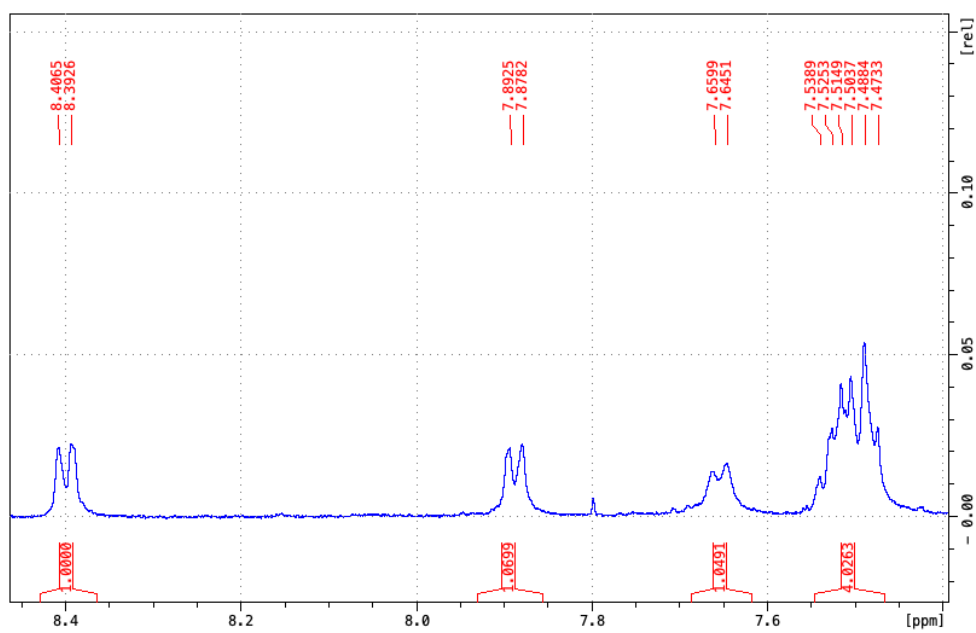

Figure S28. Expanded  $^1\text{H}$  NMR spectrum of the naphthyl group of **5**.

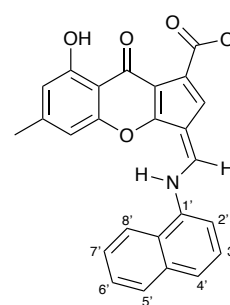

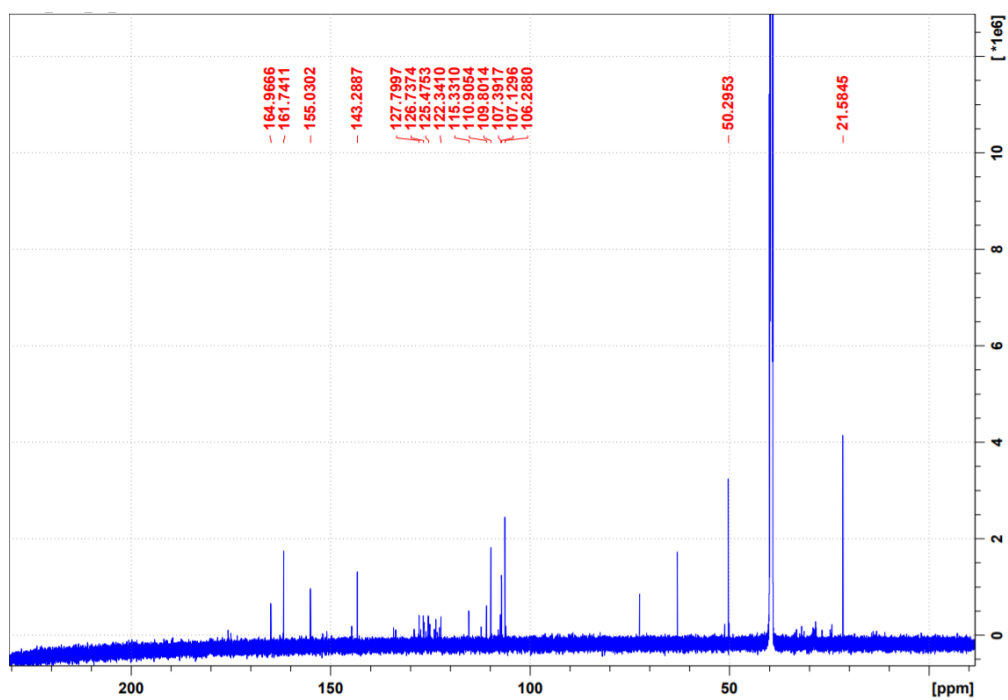

Figure S29.  $^{13}\text{C}$  NMR spectrum (176 MHz, DMSO) of **5**.

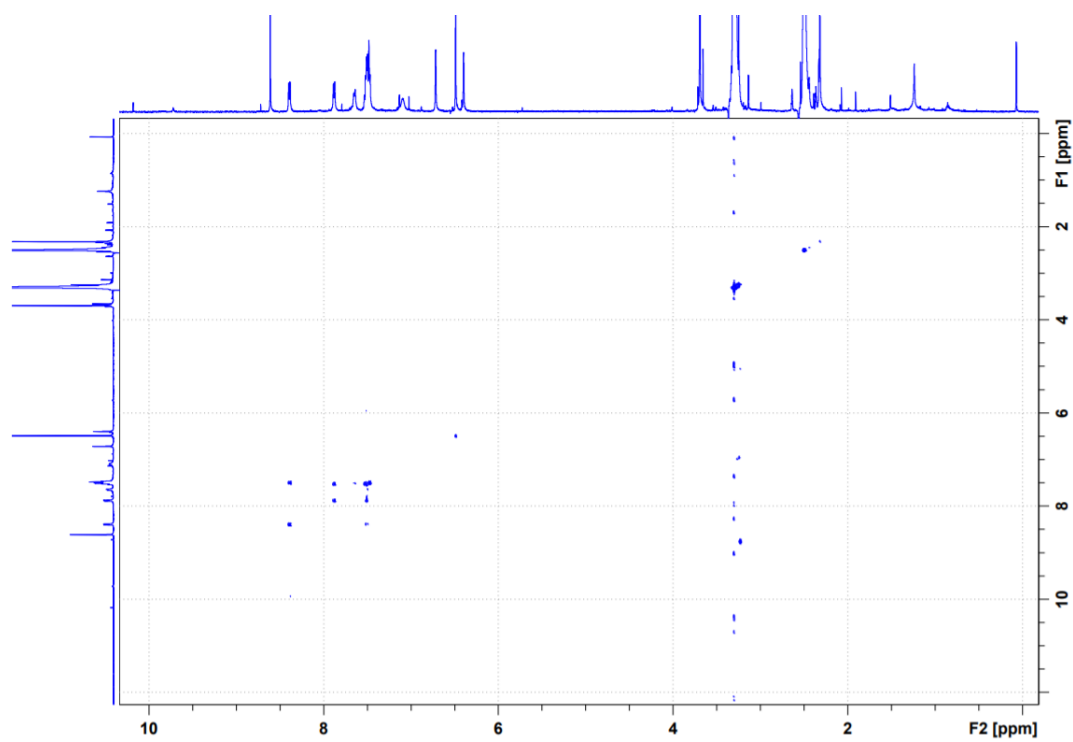

Figure S30. COSY NMR spectrum of **5**.

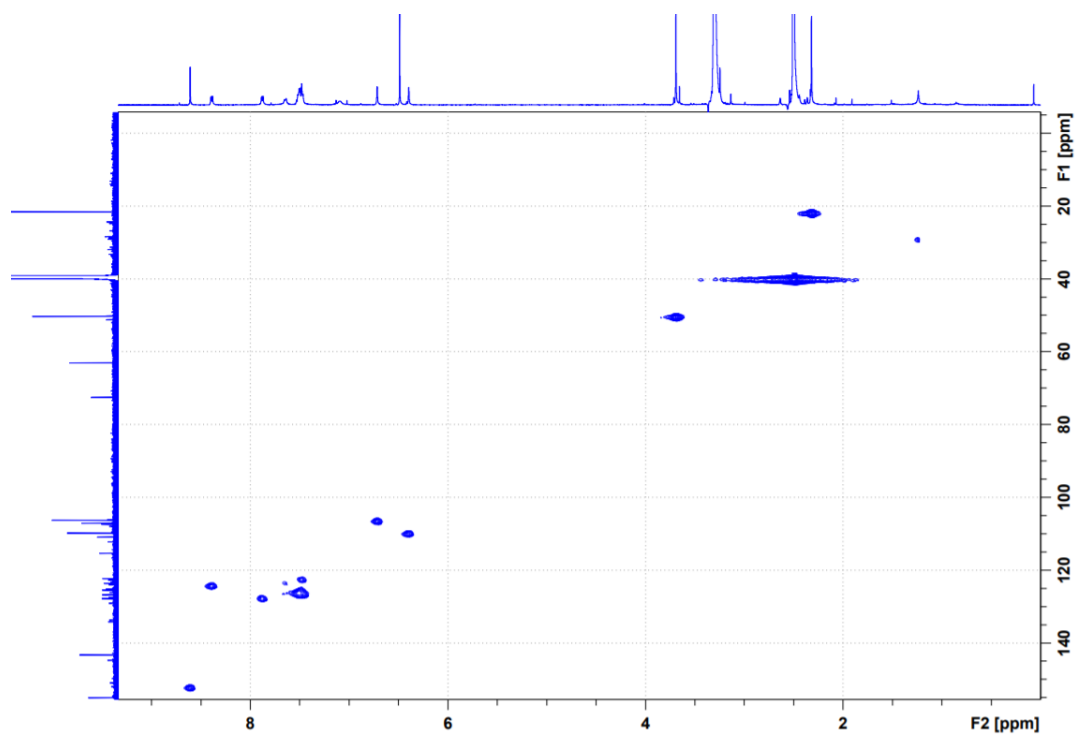

Figure S31. HSQC NMR spectrum of **5**.

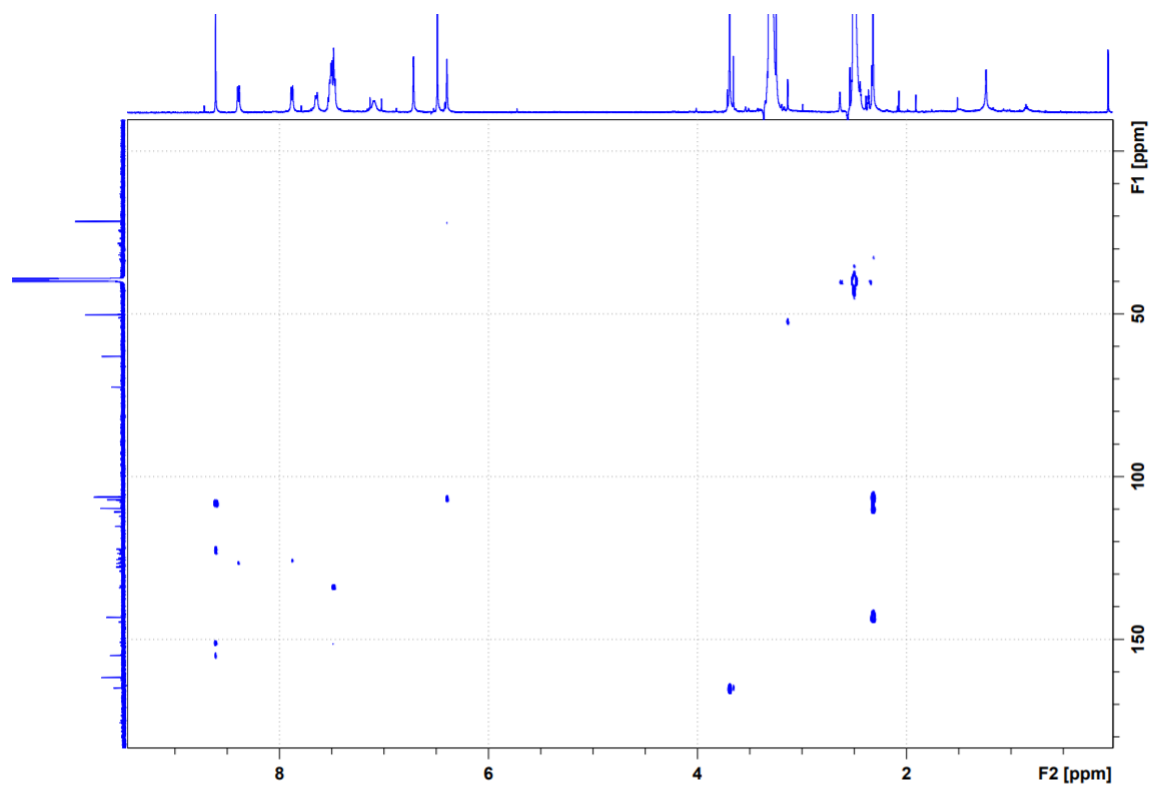

Figure S32.  $^1\text{H}$ - $^{13}\text{C}$  HMBC NMR spectrum of **5**.

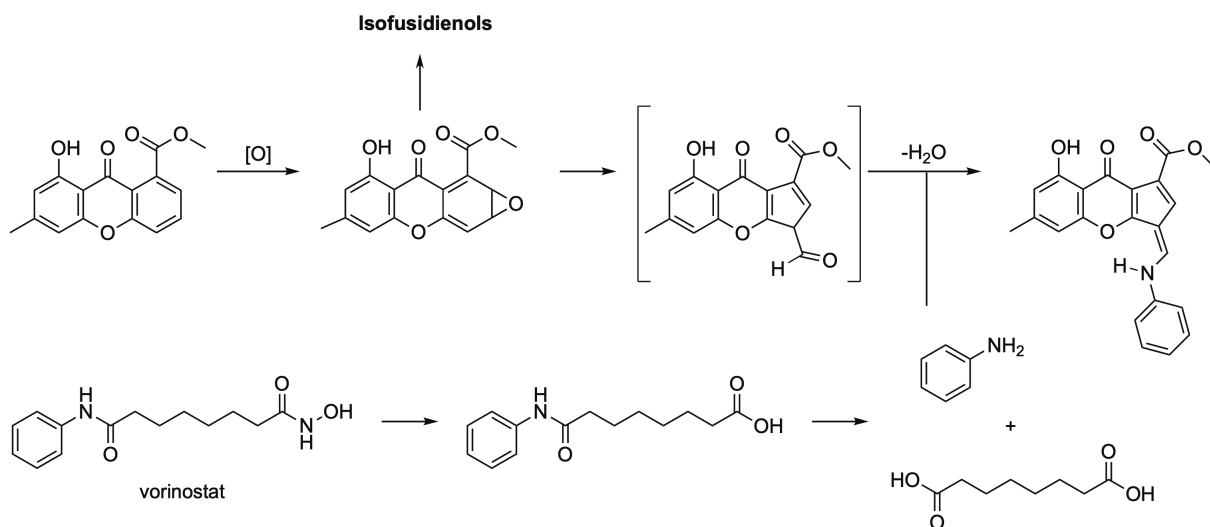

Figure S33. Biosynthetic proposal of the formation of chalanilines. Modified from [12].

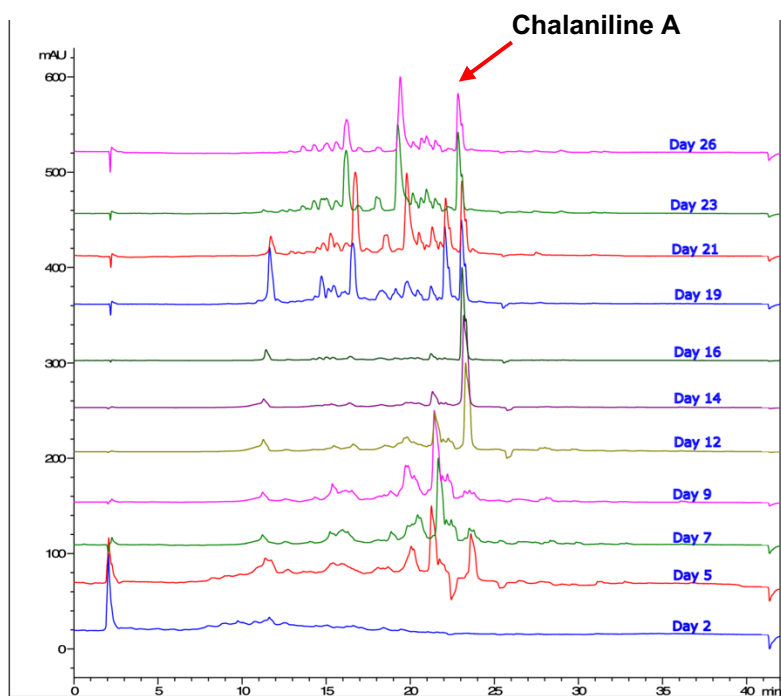

Figure S34. Assessment of chalaniline A (rt 24 min) production from day 2 to 26 of precursor addition with LCMS (UV observed at 360 nm). Highest amount of chalaniline A was observed at day 16.

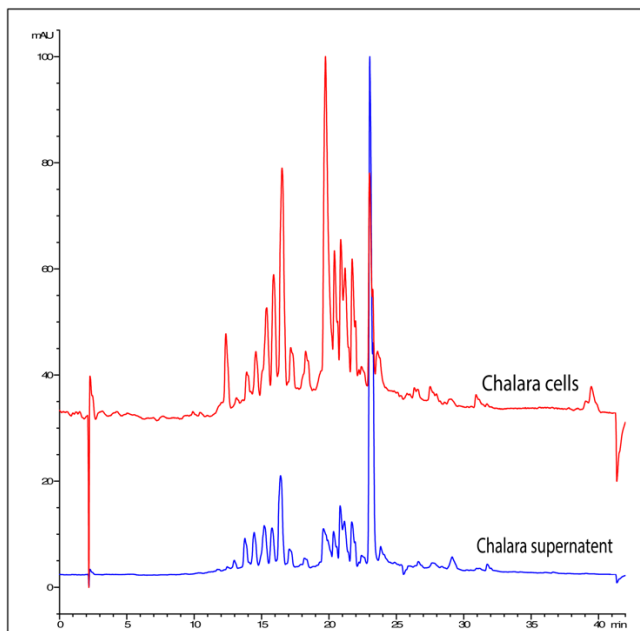

Figure S35. Chalaniline A (rt 24 min) is mainly found in the culture broth (blue) and to a lesser amount in the fungal cells (red).

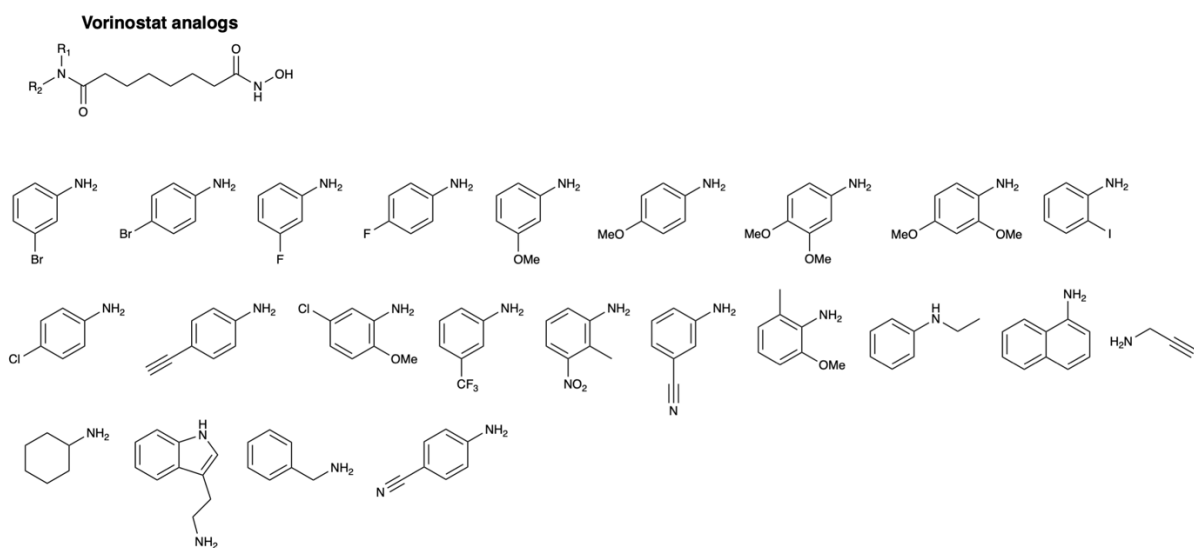

Figure S36. 23 Vorinostat derivatives prepared in this study.

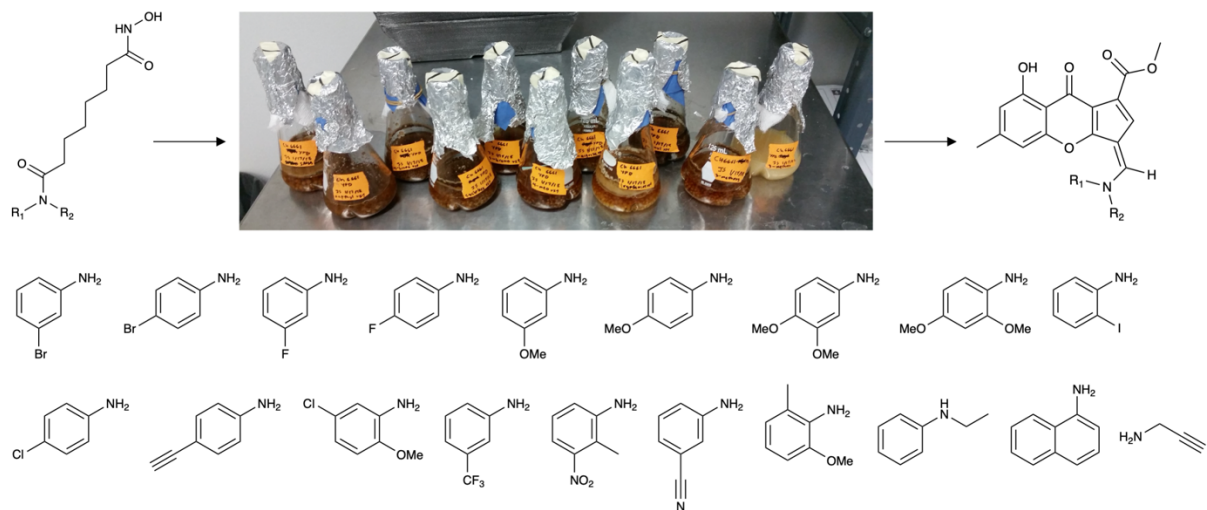

Figure S37. 19 Vorinostat analogs which were successfully incorporated into the chalaniline A structure.
